# Supplementary material for: Analysis of the Secretome of Apoptotic Peripheral Blood Mononuclear Cells: Impact of Released Proteins and Exosomes for Tissue Regeneration
Source: PubMed Central journal article supplement (PMC4645175; doi:10.1038/srep16662), 2015-11-16
Supplement: srep16662-s1.pdf [file srep16662-s1.pdf]

Supplementary information for:

## **Analysis of the Secretome of Apoptotic Peripheral Blood Mononuclear Cells: Impact of Released Proteins and Exosomes for Tissue Regeneration**

Lucian Beer<sup>1,2</sup>, Matthias Zimmermann<sup>1,2</sup>, Andreas Mitterbauer<sup>1,2</sup>, Adolf Ellinger<sup>3</sup>, Florian Gruber<sup>4,5</sup>, Marie-Sophie Narzt<sup>4,5</sup>, Maria Zellner<sup>6</sup>, Mariann Gyöngyösi<sup>7</sup>, Sibylle Madlener<sup>8</sup>, Elisabeth Simader<sup>1,2</sup>; Christian Gabriel<sup>9</sup>, Michael Mildner<sup>4\*</sup>, Hendrik Jan Ankersmit<sup>1,2\*</sup>

<sup>1</sup> Department of Thoracic Surgery, Medical University of Vienna, Austria

<sup>2</sup> Christian Doppler Laboratory for Cardiac and Thoracic Diagnosis and Regeneration, Medical University of Vienna, Austria

<sup>3</sup> Department of Cell Biology and Ultrastructure Research, Center for Anatomy and Cell Biology, Medical University of Vienna, Vienna, Austria.

<sup>4</sup> Department of Dermatology, Research Division of Biology and Pathobiology of the Skin, Medical University Vienna, Austria

<sup>5</sup> Christian Doppler Laboratory for Laboratory Biotechnology of Skin Aging, Medical, Austria

<sup>6</sup> Centre of Physiology and Pharmacology, Institute of Physiology, Medical University of Vienna, Austria

<sup>7</sup> Department of Cardiology, Medical University Vienna, Vienna, Austria

<sup>8</sup> Molecular Neuro-Oncology Research Unit, Department of Pediatrics and Adolescent Medicine and Institute of Neurology, Medical University of Vienna, Austria

<sup>9</sup> Red Cross Blood Transfusion Service of Upper Austria, Linz, Austria

\*These authors share the last and corresponding authorship.

### **Corresponding authors:**

Hendrik Jan Ankersmit, MD

Department of Thoracic Surgery, Medical University of Vienna

Christian Doppler Laboratory for Cardiac and Thoracic Diagnosis and Regeneration

Währinger Gürtel 18-20

1090 Vienna, Austria

Tel.: +43-1-40400-67770

Fax.: +43-1-40400-69770

e-mail: [hendrik.ankersmit@meduniwien.ac.at](mailto:hendrik.ankersmit@meduniwien.ac.at)

Michael Mildner, PhD

Medical University of Vienna

Department of Dermatology,

Research Division of Biology and Pathobiology of the Skin,

Lazarettgasse 14

1090 Vienna, Austria

Tel: +43-1-40400-73507

Fax: +43-1-40400-73590

e-mail: [michael.mildner@meduniwien.ac.at](mailto:michael.mildner@meduniwien.ac.at)

**Supplementary Figure S1**

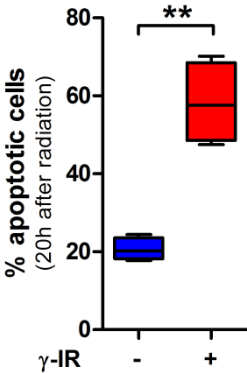

**Supplementary Figure S1**

Ionizing irradiation induces apoptosis in human PBMCs. The number of annexin V-fluorescein/propidium iodide (FITC/PI) positive PBMCs was measured at 20h after cultivation. \*\*p < 0.01; n = 4.

## Supplementary Figure S2

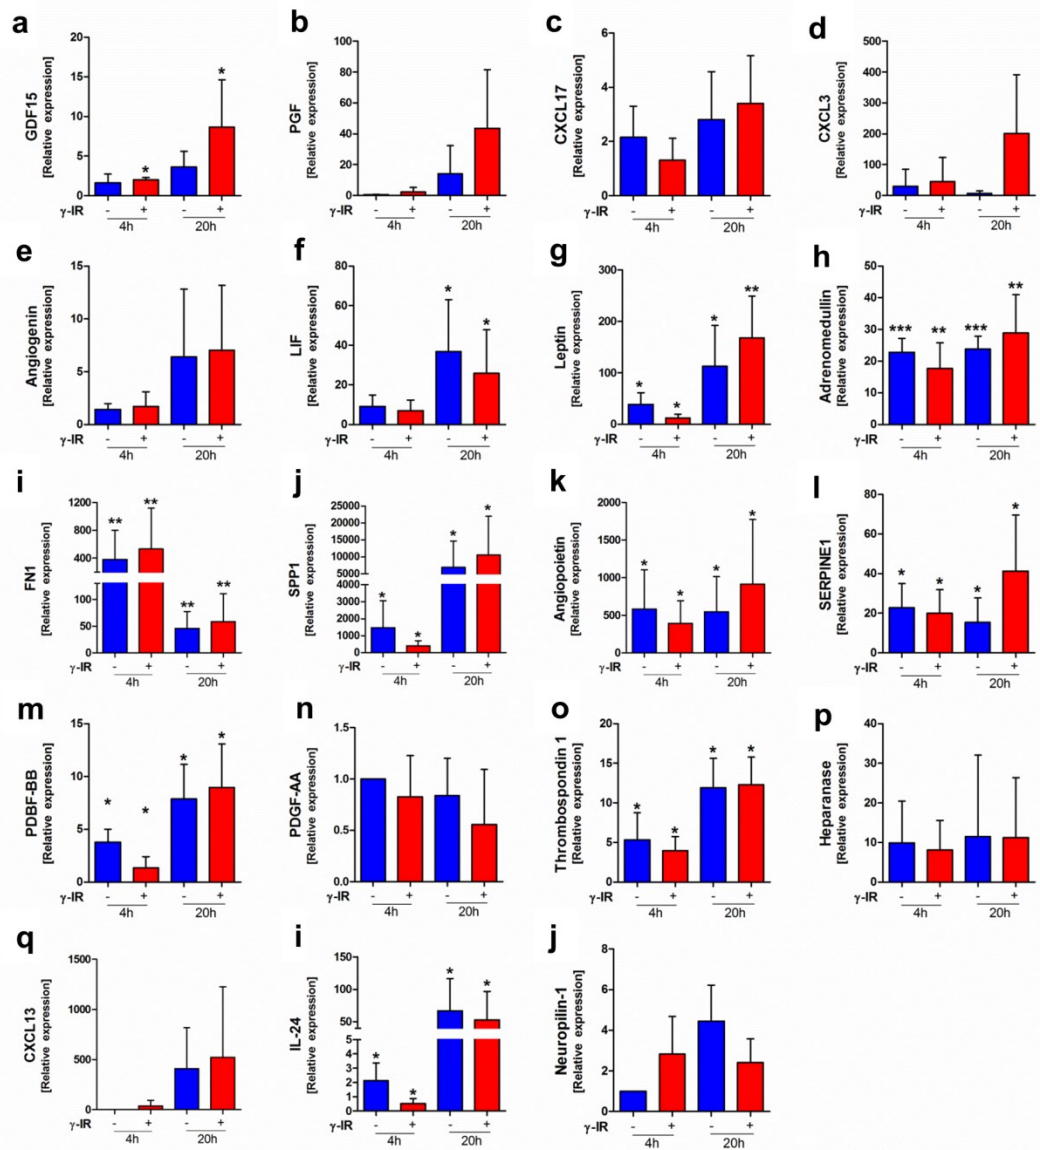

## Supplementary Figure S2

Quantitative PCR results show expression of genes involved in angiogenesis, wound healing, or chemotaxis. (a-s) In comparing levels at 4 h and 20 h, most genes showed a time dependent increase, except FN1 (i) and PDGF-AA (n). A few genes tended to show higher expression in irradiated (+, red) compared to non-irradiated (-, blue) PBMCs. Expression values were normalized to the gene expression values at 0 h. B2M served as an internal control gene. Data represent the mean  $\pm$  SD of four samples; \*p<0.05; \*\*p<0.01; \*\*\*p<0.001

### Supplementary Figure S3

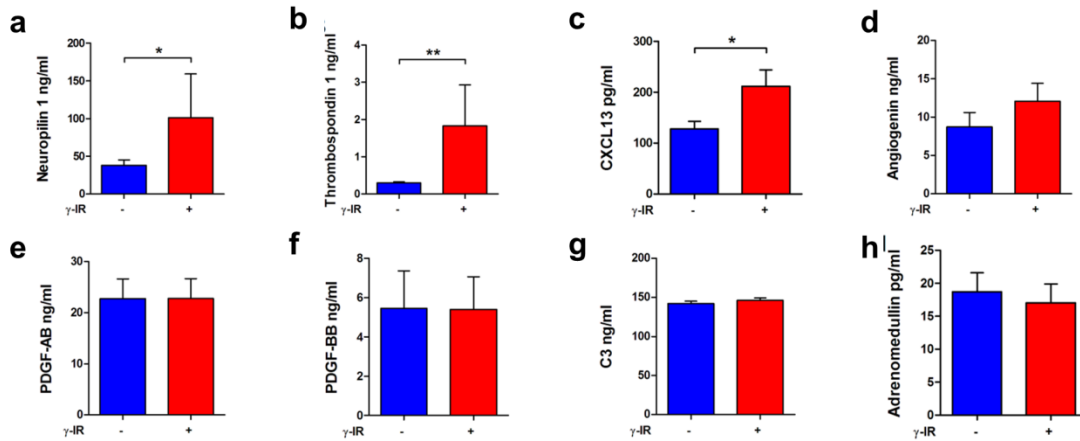

### Supplementary Figure S3

ELISA detection identified proteins isolated from the CM of non-irradiated and irradiated PBMCs measured after 20 h of culture. Cell culture medium alone (without cells) did not contain detectable amounts of any measured mediators. Protein concentrations of (a) neuropilin, (b) thrombospondin, and (c) CXCL13 were significantly higher in CM from irradiated (+, red) than in non-irradiated (-, blue) PBMCs; however, levels of (d) angiogenin, (e) PDGF-AB, (f) PDGF-BB, (g) C3, and (h) adrenomedullin were comparable in both groups. Data are given as mean  $\pm$  SD of five samples; \*p<0.05; \*\*p<0.01.

## Supplementary Figure S4

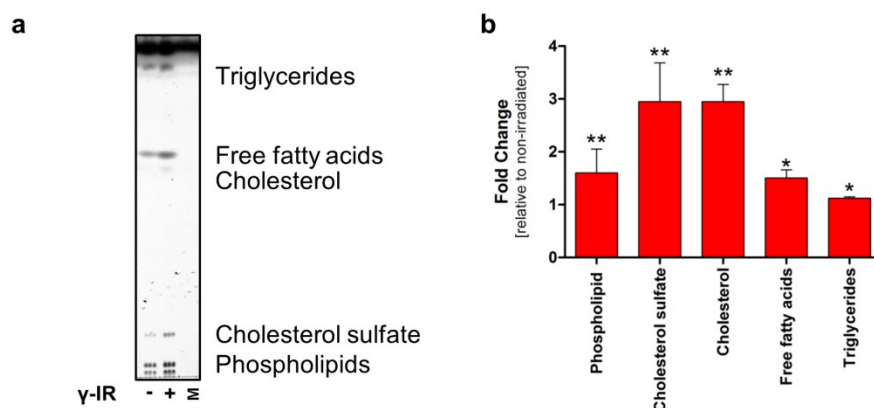

## Supplementary Figure S4

Ionizing radiation induced the release of soluble and membrane-bound lipids from human PBMCs. PBMCs were either irradiated (+) or non-irradiated (-), and cultured for 24 h. Then, the cells and cell debris were removed by serial centrifugation, and the lipids were isolated with a chloroform/methanol extraction protocol. (a) Dissolved lipids were resolved with thin layer chromatography (TLC; Pappinen et al.). Cell medium (M) cultured without cells did not contain any lipids. The CM of PBMCs contained triglycerides, free fatty acids, cholesterol, cholesterol sulfate, and phospholipids. (b) Quantitative analysis of TLC data showed that the CM samples from irradiated PBMCs had significant increases in absolute concentrations of all lipid classes compared to non-irradiated samples. Data are expressed as the mean  $\pm$  SD of four samples; \* $p < 0.05$ ; \*\* $p < 0.01$ .

### Supplementary Figure S5

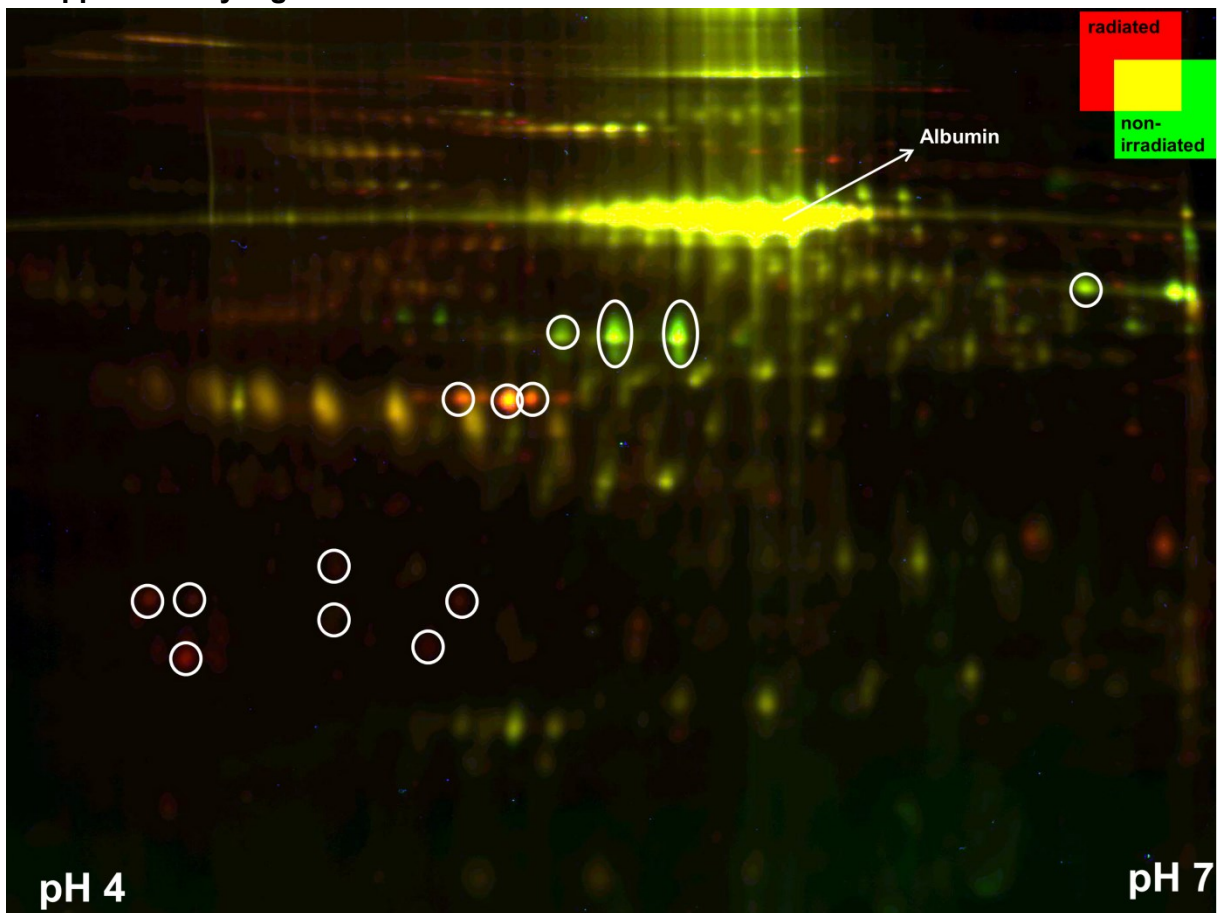

### Supplementary Figure S5

2D-Difference gel electrophoresis results show different exosome protein contents of non-irradiated and irradiated PBMCs. The total CyDye-labeled, exosome protein extract sample (45  $\mu$ g) comprised a combination of four samples (15  $\mu$ g each pooled from 4 donors): The proteins were separated in the pH range of 4-7. The red and green spots are proteins that showed increased and decreased expression, respectively, in exosomes from irradiated PBMCs, compared to exosomes from non-irradiated PBMCs. Yellow spots are proteins that show comparable concentrations in exosomes from irradiated and non-irradiated PBMCs. The white circles indicate proteins that were detected in irradiated or non-irradiated samples exclusively. The large protein spot at 66 kDa represents the albumin fraction (arrow). Exosomes from 4 donors were used for this experiment.

### Supplementary Figure S6

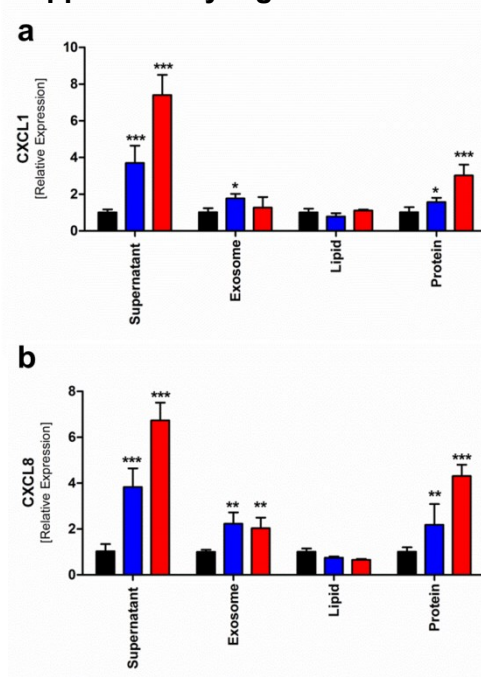

### Supplementary Figure S6

Exosomes and proteins stimulate CXCL1 and CXCL8 expression in keratinocytes.

Keratinocyte gene expression of (a) CXCL1 and (b) CXCL8 was measured relative to B2M expression (control). Keratinocytes were unstimulated (black bars) or stimulated with total CM (supernatant) or the indicated CM fractions, collected from irradiated (red bars) or non-irradiated (blue bars) PBMCs. RNA was isolated 6 h after cell stimulation. Bars represent the mean  $\pm$  SD of n=2 experiments performed in triplicate.\*p<0.05; \*\*p<0.01; \*\*\*p<0.001.



## Supplementary Figure S7

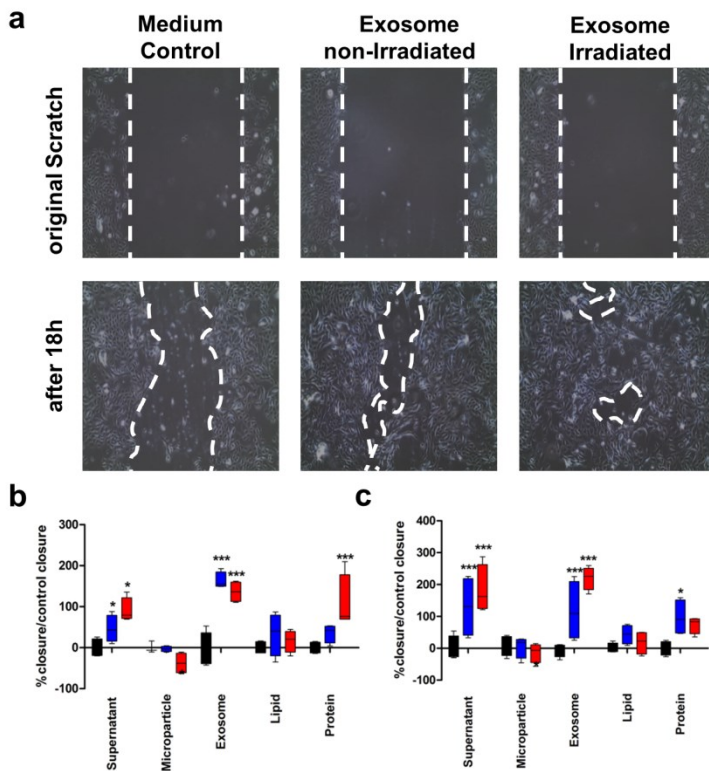

## Supplementary Figure S7

Exosomes and CM proteins enhance keratinocyte migration. (A, *top*) Keratinocyte monolayers were scratched (clear areas outlined in white dashed lines) to simulate a wound. Wounds were untreated or treated with exosome preparations from non-irradiated or irradiated PBMCs. (*Bottom*) After 18 h, fibroblast proliferation began to close the wound in (*left*) untreated and (*middle, right*) treated cultures. Treatment with PBMC-derived exosomes accelerated wound closure. 10 fold magnification (b) Wound areas were measured in 8 scratches after 24 h. The percentage of closure compared to closure in control (untreated) was calculated. (c) The same experiment was performed with keratinocytes, but without using 10% CellGro medium as basal medium. In this experimental setup, the proliferative effects of primary CM, exosomes, and CM proteins were more pronounced than the effects observed in the initial experimental setting. Data are expressed as the mean  $\pm$  SD of two independent experiments. \* $p < 0.05$ ; \*\*\* $p < 0.001$ .



## Supplementary Figure S8

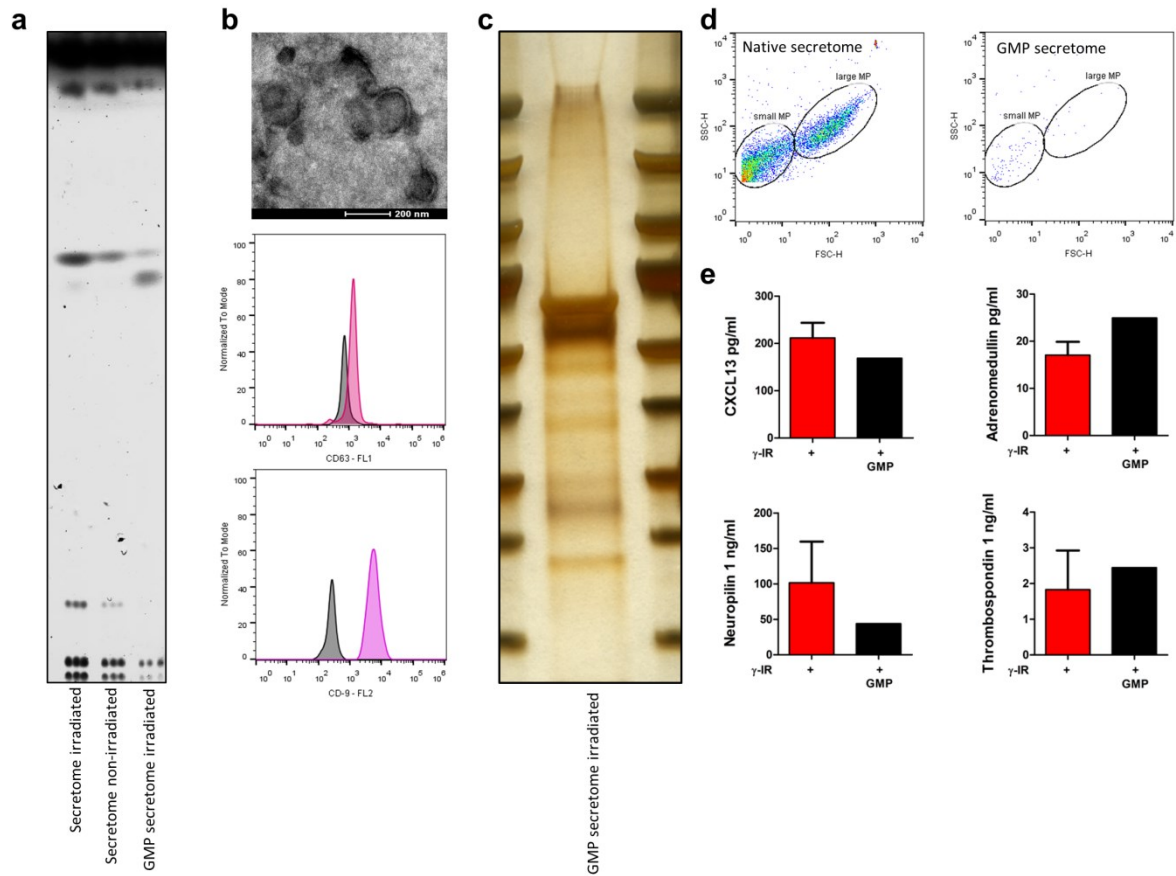

## Supplementary Figure S8

Comparability of biological components of the PBMC secretome, isolated with experimental methods or under GMP conditions. (a) TLC shows secretomes from CM isolated from irradiated (*line 1*) and non-irradiated (*line 2*) PBMCs, and CM from irradiated PBMCs, but processed under GMP-compliant conditions (*line 3*). The absolute concentration of lipids was lower in the GMP-compliant CM; however, except for cholesterol, the lipid compositions were comparable in the two different preparations. (b) *Top*: TEM image of exosomes derived from GMP-compliant CM showed vesicles with a diameter of ~100 nm. Scale bar = 200 nm. (*Middle, bottom*) FACS analysis showed that these vesicles were positive for CD63 and CD9, as indicated. (c) After exosomes were lysed, the proteins were separated with 1-D gel electrophoresis and stained with silver stain. Several different protein bands were detected with quality comparable to that observed in exosomes derived from CM with the experimental protocols. (d) GMP-compliant CM did not contain considerable numbers of microparticles. In

the GMP protocol, microparticles were removed by filtration through 0.2- $\mu$ m filters. (e)  
Selected CM proteins were compared between experimental (+, red) and GMP-compliant (black) preparations. Similar concentrations were detectable for CXCL13, adrenomedullin, and thrombospondin. Neuropilin concentrations tended to be lower in GMP-compliant CM.

**Supplementary Table 1:** Enrichment of GO-terms in up-regulated genes coding for secretory proteins in **irradiated** PBMCs.

| GO-Term    | Enriched terms                      | p-value  | Enrichment Score | Number of Genes |
|------------|-------------------------------------|----------|------------------|-----------------|
| GO:0001568 | blood vessel development            | 1.53e-07 | 5.32             | 22              |
| GO:0045766 | positive regulation of angiogenesis | 3.00e-05 | 6.34             | 10              |
| GO:0042060 | wound healing                       | 0.0012   | 2.74             | 21              |
| GO:0032502 | developmental processes             | 0.0007   | 1.65             | 83              |
| GO:0007599 | hemostasis                          | 0.0007   | 3.08             | 19              |
| GO:0050819 | negative regulation of coagulation  | 0.0007   | 11.68            | 6               |
| GO:0050900 | leukocyte migration                 | 0.0007   | 4.28             | 13              |

Biological Function of the 213 gene products. The 213 genes were classified into different biological processes. Biological processes that were over-represented in the data set relative to the frequency of genes in a reference database with a corrected p value <0.05 are given.

Enrichment of GO-terms in up-regulated genes coding for secretory proteins in **non-irradiated** PBMCs.

| GO-Term    | Enriched terms                                                                | p-value | Enrichment Score | Number of Genes |
|------------|-------------------------------------------------------------------------------|---------|------------------|-----------------|
| GO:0051955 | regulation of amino acid transport<br>regulation of B cell receptor signaling | 0.0403  | 15.39            | 3               |
| GO:0050855 | pathway                                                                       | 0.0490  | 33.71            | 2               |
| GO:0044060 | regulation of endocrine process                                               | 0.0116  | 20.52            | 4               |

Biological Function of the 179 gene products. The 179 genes were classified into different biological processes. Biological processes that were over-represented in the data set relative to the frequency of genes in a reference database with a corrected p value <0.05 are given.

**Supplementary Table 2:** 213 Up-regulated transcripts in **irradiated** PBMC coding for secretory proteins

| Gene Symbol | EntrezGene | Gene Name                                                                                                |
|-------------|------------|----------------------------------------------------------------------------------------------------------|
| C16orf74    | 404550     | chromosome 16 open reading frame 74                                                                      |
| CYP17A1     | 1586       | cytochrome P450, family 17, subfamily A, polypeptide 1                                                   |
| HIST1H2AD   | 3013       | histone cluster 1, H2ad                                                                                  |
| TESK2       | 10420      | testis-specific kinase 2                                                                                 |
| GSTT2       | 2953       | glutathione S-transferase theta 2                                                                        |
| P4HA1       | 5033       | prolyl 4-hydroxylase, alpha polypeptide I                                                                |
| SPINK1      | 6690       | serine peptidase inhibitor, Kazal type 1                                                                 |
| RRAD        | 6236       | Ras-related associated with diabetes                                                                     |
| TIPARP      | 25976      | TCDD-inducible poly(ADP-ribose) polymerase                                                               |
| HIST1H2AK   | 8330       | histone cluster 1, H2ak                                                                                  |
| SERPINE1    | 5054       | serpin peptidase inhibitor, clade E (nexin, plasminogen activator inhibitor type 1), member 1            |
| CHMP1B      | 57132      | charged multivesicular body protein 1B                                                                   |
| VCAN        | 1462       | versican                                                                                                 |
| AHRR        | 57491      | aryl-hydrocarbon receptor repressor                                                                      |
| UBE2A       | 7319       | ubiquitin-conjugating enzyme E2A                                                                         |
| IBA57       | 200205     | IBA57, iron-sulfur cluster assembly homolog ( <i>S. cerevisiae</i> )                                     |
| MDGA1       | 266727     | MAM domain containing glycosylphosphatidylinositol anchor 1                                              |
| MANF        | 7873       | mesencephalic astrocyte-derived neurotrophic factor                                                      |
| IVNS1ABP    | 10625      | influenza virus NS1A binding protein                                                                     |
| CXCL3       | 2921       | chemokine (C-X-C motif) ligand 3                                                                         |
| EYA3        | 2140       | eyes absent homolog 3 ( <i>Drosophila</i> )                                                              |
| SH2D6       | 284948     | SH2 domain containing 6                                                                                  |
| EDARADD     | 128178     | EDAR-associated death domain                                                                             |
| TGIF1       | 7050       | TGFB-induced factor homeobox 1                                                                           |
| LRRC6       | 23639      | leucine rich repeat containing 6                                                                         |
| ALCAM       | 214        | activated leukocyte cell adhesion molecule                                                               |
| MSL1        | 339287     | male-specific lethal 1 homolog ( <i>Drosophila</i> )                                                     |
| IL24        | 11009      | interleukin 24                                                                                           |
| ASPHD1      | 253982     | aspartate beta-hydroxylase domain containing 1                                                           |
| GDF15       | 9518       | growth differentiation factor 15                                                                         |
| GRB10       | 2887       | growth factor receptor-bound protein 10                                                                  |
| LPO         | 4025       | lactoperoxidase                                                                                          |
| STX5        | 6811       | syntaxin 5                                                                                               |
| PLEKHH3     | 79990      | pleckstrin homology domain containing, family H (with MyTH4 domain) member 3                             |
| RAB42       | 115273     | RAB42, member RAS oncogene family                                                                        |
| FANCL       | 55120      | Fanconi anemia, complementation group L                                                                  |
| P4HA2       | 8974       | prolyl 4-hydroxylase, alpha polypeptide II                                                               |
| S100A5      | 6276       | S100 calcium binding protein A5                                                                          |
| MFAP4       | 4239       | microfibrillar-associated protein 4                                                                      |
| GATSL3      | 652968     | GATS protein-like 3                                                                                      |
| PATE2       | 399967     | prostate and testis expressed 2                                                                          |
| FLT1        | 2321       | fms-related tyrosine kinase 1 (vascular endothelial growth factor/vascular permeability factor receptor) |
| DENND5A     | 23258      | DENN/MADD domain containing 5A                                                                           |
| DLG4        | 1742       | discs, large homolog 4 ( <i>Drosophila</i> )                                                             |
| DRGX        | 644168     | dorsal root ganglia homeobox                                                                             |
| LAD1        | 3898       | ladinin 1                                                                                                |
| CST6        | 1474       | cystatin E/M                                                                                             |

|           |        |                                                                                                           |
|-----------|--------|-----------------------------------------------------------------------------------------------------------|
| GNA12     | 2768   | guanine nucleotide binding protein (G protein) alpha 12                                                   |
| IL23A     | 51561  | interleukin 23, alpha subunit p19                                                                         |
| SEC24A    | 10802  | SEC24 family, member A ( <i>S. cerevisiae</i> )                                                           |
| TSHB      | 7252   | thyroid stimulating hormone, beta                                                                         |
| PPIF      | 10105  | peptidylprolyl isomerase F                                                                                |
| TBX6      | 6911   | T-box 6                                                                                                   |
| KCNE1     | 3753   | potassium voltage-gated channel, Isk-related family, member 1                                             |
| IL1A      | 3552   | interleukin 1, alpha                                                                                      |
| GADD45G   | 10912  | growth arrest and DNA-damage-inducible, gamma                                                             |
| FHL3      | 2275   | four and a half LIM domains 3                                                                             |
| NAGS      | 162417 | N-acetylglutamate synthase                                                                                |
| ACOX2     | 8309   | acyl-CoA oxidase 2, branched chain                                                                        |
| EFEMP2    | 30008  | EGF containing fibulin-like extracellular matrix protein 2                                                |
| AK2       | 204    | adenylate kinase 2                                                                                        |
| PDE2A     | 5138   | phosphodiesterase 2A, cGMP-stimulated                                                                     |
| TUBB2A    | 7280   | tubulin, beta 2A class IIa                                                                                |
| VWCE      | 220001 | von Willebrand factor C and EGF domains                                                                   |
| TFPI2     | 7980   | tissue factor pathway inhibitor 2                                                                         |
| TOB2      | 10766  | transducer of ERBB2, 2                                                                                    |
| THBS1     | 7057   | thrombospondin 1                                                                                          |
| MF12      | 4241   | antigen p97 (melanoma associated) identified by monoclonal antibodies 133.2 and 96.5                      |
| SMOX      | 54498  | spermine oxidase                                                                                          |
| IFNA7     | 3444   | interferon, alpha 7                                                                                       |
| CDKN1A    | 1026   | cyclin-dependent kinase inhibitor 1A (p21, Cip1)                                                          |
| BBC3      | 27113  | BCL2 binding component 3                                                                                  |
| PCOLCE2   | 26577  | procollagen C-endopeptidase enhancer 2                                                                    |
| PPFIA1    | 8500   | protein tyrosine phosphatase, receptor type, f polypeptide (PTPRF), interacting protein (liprin), alpha 1 |
| NOTCH3    | 4854   | notch 3                                                                                                   |
| PLD2      | 5338   | phospholipase D2                                                                                          |
| PPP1R3B   | 79660  | protein phosphatase 1, regulatory subunit 3B                                                              |
| H2AFX     | 3014   | H2A histone family, member X                                                                              |
| ALOX15B   | 247    | arachidonate 15-lipoxygenase, type B                                                                      |
| HIST1H2AG | 8969   | histone cluster 1, H2ag                                                                                   |
| CXCL13    | 10563  | chemokine (C-X-C motif) ligand 13                                                                         |
| PDGFB     | 5155   | platelet-derived growth factor beta polypeptide                                                           |
| RNASET2   | 8635   | ribonuclease T2                                                                                           |
| NRP1      | 8829   | neuropilin 1                                                                                              |
| LIF       | 3976   | leukemia inhibitory factor                                                                                |
| LACC1     | 144811 | laccase (multicopper oxidoreductase) domain containing 1                                                  |
| TIMP1     | 7076   | TIMP metalloproteinase inhibitor 1                                                                        |
| PRSS53    | 339105 | protease, serine, 53                                                                                      |
| PINLYP    | 390940 | phospholipase A2 inhibitor and LY6/PLAUR domain containing                                                |
| ANGPTL4   | 51129  | angiopoietin-like 4                                                                                       |
| LEP       | 3952   | leptin                                                                                                    |
| ERO1L     | 30001  | ERO1-like ( <i>S. cerevisiae</i> )                                                                        |
| RGL3      | 57139  | ral guanine nucleotide dissociation stimulator-like 3                                                     |
| PPP1R3G   | 648791 | protein phosphatase 1, regulatory subunit 3G                                                              |
| CXCL5     | 6374   | chemokine (C-X-C motif) ligand 5                                                                          |
| COL27A1   | 85301  | collagen, type XXVII, alpha 1                                                                             |
| PLOD2     | 5352   | procollagen-lysine, 2-oxoglutarate 5-dioxygenase 2                                                        |
| C4orf47   | 441054 | chromosome 4 open reading frame 47                                                                        |
| NMNAT1    | 64802  | nicotinamide nucleotide adenylyltransferase 1                                                             |
| DCAF4L2   | 138009 | DDB1 and CUL4 associated factor 4-like 2                                                                  |

|             |           |                                                                                    |
|-------------|-----------|------------------------------------------------------------------------------------|
| IGLON5      | 402665    | IgLON family member 5                                                              |
| FUT11       | 170384    | fucosyltransferase 11 (alpha (1,3) fucosyltransferase)                             |
| C16orf72    | 29035     | chromosome 16 open reading frame 72                                                |
| PELI3       | 246330    | pellino E3 ubiquitin protein ligase family member 3                                |
| EPPIN-WFDC6 | 100526773 | EPPIN-WFDC6 readthrough                                                            |
| RGS13       | 6003      | regulator of G-protein signaling 13                                                |
| RSPH9       | 221421    | radial spoke head 9 homolog (Chlamydomonas)                                        |
| GPNMB       | 10457     | glycoprotein (transmembrane) nmb                                                   |
| PCNA        | 5111      | proliferating cell nuclear antigen                                                 |
| RND1        | 27289     | Rho family GTPase 1                                                                |
| TMEM189     | 387521    | transmembrane protein 189                                                          |
| C20orf96    | 140680    | chromosome 20 open reading frame 96                                                |
| AVP11       | 60370     | arginine vasopressin-induced 1                                                     |
| THAP8       | 199745    | THAP domain containing 8                                                           |
| LACTB       | 114294    | lactamase, beta                                                                    |
| FGF11       | 2256      | fibroblast growth factor 11                                                        |
| ATP7A       | 538       | ATPase, Cu <sup>++</sup> transporting, alpha polypeptide                           |
| NIM1        | 167359    | serine/threonine-protein kinase NIM1                                               |
| INHBA       | 3624      | inhibin, beta A                                                                    |
| HIST1H2AI   | 8329      | histone cluster 1, H2ai                                                            |
| RBP4        | 5950      | retinol binding protein 4, plasma                                                  |
| C6orf170    | 221322    | chromosome 6 open reading frame 170                                                |
| HIST1H2AC   | 8334      | histone cluster 1, H2ac                                                            |
| TGM2        | 7052      | transglutaminase 2 (C polypeptide, protein-glutamine-gamma-glutamyltransferase)    |
| QSOX1       | 5768      | quiescin Q6 sulfhydryl oxidase 1                                                   |
| TKTL1       | 8277      | transketolase-like 1                                                               |
| SERTAD1     | 29950     | SERTA domain containing 1                                                          |
| PDLIM7      | 9260      | PDZ and LIM domain 7 (enigma)                                                      |
| NPTX1       | 4884      | neuronal pentraxin I                                                               |
| AGRN        | 375790    | agrin                                                                              |
| COL7A1      | 1294      | collagen, type VII, alpha 1                                                        |
| WBP5        | 51186     | WW domain binding protein 5                                                        |
| CIRBP       | 1153      | cold inducible RNA binding protein                                                 |
| SLC5A6      | 8884      | solute carrier family 5 (sodium-dependent vitamin transporter), member 6           |
| HIST1H2AL   | 8332      | histone cluster 1, H2al                                                            |
| ADM         | 133       | adrenomedullin                                                                     |
| IGF2        | 3481      | insulin-like growth factor 2 (somatomedin A)                                       |
| PGF         | 5228      | placental growth factor                                                            |
| PDK4        | 5166      | pyruvate dehydrogenase kinase, isozyme 4                                           |
| PLA2G7      | 7941      | phospholipase A2, group VII (platelet-activating factor acetylhydrolase, plasma)   |
| SPP1        | 6696      | secreted phosphoprotein 1                                                          |
| ZNF697      | 90874     | zinc finger protein 697                                                            |
| HIST1H2AM   | 8336      | histone cluster 1, H2am                                                            |
| TP53INP2    | 58476     | tumor protein p53 inducible nuclear protein 2                                      |
| S100A11     | 6282      | S100 calcium binding protein A11                                                   |
| HTRA1       | 5654      | HtrA serine peptidase 1                                                            |
| DFNA5       | 1687      | deafness, autosomal dominant 5                                                     |
| EFNA3       | 1944      | ephrin-A3                                                                          |
| FOXR1       | 283150    | forkhead box R1                                                                    |
| INPP1       | 3628      | inositol polyphosphate-1-phosphatase                                               |
| SLC25A19    | 60386     | solute carrier family 25 (mitochondrial thiamine pyrophosphate carrier), member 19 |

|          |        |                                                                     |
|----------|--------|---------------------------------------------------------------------|
| ADAMDEC1 | 27299  | ADAM-like, decysin 1                                                |
| EGLN3    | 112399 | egl nine homolog 3 (C. elegans)                                     |
| ENO2     | 2026   | enolase 2 (gamma, neuronal)                                         |
| RAB17    | 64284  | RAB17, member RAS oncogene family                                   |
| ARL8B    | 55207  | ADP-ribosylation factor-like 8B                                     |
| GPX3     | 2878   | glutathione peroxidase 3 (plasma)                                   |
| MATN1    | 4146   | matrilin 1, cartilage matrix protein                                |
| ADAMTSL4 | 54507  | ADAMTS-like 4                                                       |
| WDR54    | 84058  | WD repeat domain 54                                                 |
| ANXA5    | 308    | annexin A5                                                          |
| FGF5     | 2250   | fibroblast growth factor 5                                          |
| PLAT     | 5327   | plasminogen activator, tissue                                       |
| LYPD3    | 27076  | LY6/PLAUR domain containing 3                                       |
| METTL2   | 751071 | methyltransferase like 12                                           |
| VMO1     | 284013 | vitelline membrane outer layer 1 homolog (chicken)                  |
| ITGBL1   | 9358   | integrin, beta-like 1 (with EGF-like repeat domains)                |
| GATA4    | 2626   | GATA binding protein 4                                              |
| SERAC1   | 84947  | serine active site containing 1                                     |
| GNA15    | 2769   | guanine nucleotide binding protein (G protein), alpha 15 (Gq class) |
| COL16A1  | 1307   | collagen, type XVI, alpha 1                                         |
| SIX3     | 6496   | SIX homeobox 3                                                      |
| IER5L    | 389792 | immediate early response 5-like                                     |
| MICALL2  | 79778  | MICAL-like 2                                                        |
| ZNF808   | 388558 | zinc finger protein 808                                             |
| CD109    | 135228 | CD109 molecule                                                      |
| SFTPA1   | 653509 | surfactant protein A1                                               |
| IL18BP   | 10068  | interleukin 18 binding protein                                      |
| GSTT2B   | 653689 | glutathione S-transferase theta 2B (gene/pseudogene)                |
| FCAR     | 2204   | Fc fragment of IgA, receptor for                                    |
| RAB13    | 5872   | RAB13, member RAS oncogene family                                   |
| FN1      | 2335   | fibronectin 1                                                       |
| CLLU1OS  | 574016 | chronic lymphocytic leukemia up-regulated 1 opposite strand         |
| DHRS9    | 10170  | dehydrogenase/reductase (SDR family) member 9                       |
| GADD45B  | 4616   | growth arrest and DNA-damage-inducible, beta                        |
| PLIN5    | 440503 | perilipin 5                                                         |
| SLC26A6  | 65010  | solute carrier family 26, member 6                                  |
| EIF4A3   | 9775   | eukaryotic translation initiation factor 4A3                        |
| DPCD     | 25911  | deleted in primary ciliary dyskinesia homolog (mouse)               |
| RFX2     | 5990   | regulatory factor X, 2 (influences HLA class II expression)         |
| PRSS37   | 136242 | protease, serine, 37                                                |
| SLAMF9   | 89886  | SLAM family member 9                                                |
| HPSE     | 10855  | heparanase                                                          |
| UBE2V1   | 7335   | ubiquitin-conjugating enzyme E2 variant 1                           |
| EPPIN    | 57119  | epididymal peptidase inhibitor                                      |
| TPI1     | 7167   | triosephosphate isomerase 1                                         |
| PROC     | 5624   | protein C (inactivator of coagulation factors Va and VIIIa)         |
| EGFL7    | 51162  | EGF-like-domain, multiple 7                                         |
| DEFB128  | 245939 | defensin, beta 128                                                  |
| PLXNB3   | 5365   | plexin B3                                                           |
| ATF5     | 22809  | activating transcription factor 5                                   |
| ANGPT4   | 51378  | angiopoietin 4                                                      |
| TGM5     | 9333   | transglutaminase 5                                                  |
| ANG1     | 7556   | Angiogenin                                                          |
| MOB3B    | 79817  | MOB kinase activator 3B                                             |



|         |       |                                                                                        |
|---------|-------|----------------------------------------------------------------------------------------|
| MMP9    | 4318  | matrix metalloproteinase 9 (gelatinase B, 92kDa gelatinase, 92kDa type IV collagenase) |
| WDR74   | 54663 | WD repeat domain 74                                                                    |
| TFPI    | 7035  | tissue factor pathway inhibitor (lipoprotein-associated coagulation inhibitor)         |
| ST8SIA4 | 7903  | ST8 alpha-N-acetyl-neuraminide alpha-2,8-sialyltransferase 4                           |
| SCUBE1  | 80274 | signal peptide, CUB domain, EGF-like 1                                                 |
| C3      | 718   | complement component 3                                                                 |
| NOL3    | 8996  | nucleolar protein 3 (apoptosis repressor with CARD domain)                             |
| PLXNA3  | 55558 | plexin A3                                                                              |

---

The list was generated by positive selection of up-regulated genes in irradiated PBMC with SignalP and SecretomeP analysis followed by negative selection with TMHMM analysis excluding proteins with transmembrane helices.

**Supplementary Table 3:** 179 Up-regulated transcripts in **non-irradiated** PBMC coding for secretory proteins

| Gene Symbol   | EntrezGene | Gene Name                                                                                           |
|---------------|------------|-----------------------------------------------------------------------------------------------------|
| HIST1H2AD     | 3013       | histone cluster 1, H2ad                                                                             |
| C1orf151-NBL1 | 100532736  | C1orf151-NBL1 readthrough                                                                           |
| IDS           | 3423       | iduronate 2-sulfatase                                                                               |
| UFSP2         | 55325      | UFM1-specific peptidase 2                                                                           |
| ZNF143        | 7702       | zinc finger protein 143                                                                             |
| TUBE1         | 51175      | tubulin, epsilon 1                                                                                  |
| NXPH4         | 11247      | neurexophilin 4                                                                                     |
| AGXT2L2       | 85007      | alanine-glyoxylate aminotransferase 2-like 2                                                        |
| P4HA1         | 5033       | prolyl 4-hydroxylase, alpha polypeptide I                                                           |
| TTC9C         | 283237     | tetratricopeptide repeat domain 9C                                                                  |
| SUPV3L1       | 6832       | suppressor of var1, 3-like 1 ( <i>S. cerevisiae</i> )                                               |
| SDS           | 10993      | serine dehydratase                                                                                  |
| VPS37A        | 137492     | vacuolar protein sorting 37 homolog A ( <i>S. cerevisiae</i> )                                      |
| HIST1H2AK     | 8330       | histone cluster 1, H2ak                                                                             |
| VASH2         | 79805      | vasohibin 2                                                                                         |
| PPM1K         | 152926     | protein phosphatase, Mg <sup>2+</sup> /Mn <sup>2+</sup> dependent, 1K                               |
| RSPRY1        | 89970      | ring finger and SPRY domain containing 1                                                            |
| PHRF1         | 57661      | PHD and ring finger domains 1                                                                       |
| AHRR          | 57491      | aryl-hydrocarbon receptor repressor                                                                 |
| EPAS1         | 2034       | endothelial PAS domain protein 1                                                                    |
| XPA           | 7507       | xeroderma pigmentosum, complementation group A                                                      |
| IVNS1ABP      | 10625      | influenza virus NS1A binding protein<br>sparc/osteonectin, cwcv and kazal-like domains proteoglycan |
| SPOCK2        | 9806       | (testican) 2                                                                                        |
| IL4R          | 3566       | interleukin 4 receptor                                                                              |
| ZNF250        | 58500      | zinc finger protein 250                                                                             |
| ALCAM         | 214        | activated leukocyte cell adhesion molecule                                                          |
| N4BP2L1       | 90634      | NEDD4 binding protein 2-like 1                                                                      |
| IL24          | 11009      | interleukin 24                                                                                      |
| ZNF563        | 147837     | zinc finger protein 563                                                                             |
| WDFY2         | 115825     | WD repeat and FYVE domain containing 2                                                              |
| KRTAP4-8      | 728224     | keratin associated protein 4-8                                                                      |
| MAP1LC3A      | 84557      | microtubule-associated protein 1 light chain 3 alpha                                                |
| B3GALNT2      | 148789     | beta-1,3-N-acetylgalactosaminyltransferase 2                                                        |
| LPO           | 4025       | lactoperoxidase                                                                                     |
| RPL28         | 6158       | ribosomal protein L28                                                                               |
| SRSF1         | 6426       | serine/arginine-rich splicing factor 1                                                              |
| C15orf53      | 400359     | chromosome 15 open reading frame 53                                                                 |
| P4HA2         | 8974       | prolyl 4-hydroxylase, alpha polypeptide II                                                          |
| NUP43         | 348995     | nucleoporin 43kDa                                                                                   |
| CHORDC1       | 26973      | cysteine and histidine-rich domain (CHORD) containing 1                                             |
| SNED1         | 25992      | sushi, nidogen and EGF-like domains 1                                                               |
| SP140         | 11262      | SP140 nuclear body protein                                                                          |
| VENTX         | 27287      | VENT homeobox                                                                                       |
| FEZ1          | 9638       | fasciculation and elongation protein zeta 1 (zygin I)                                               |
| EBLN2         | 55096      | endogenous Bornavirus-like nucleoprotein 2                                                          |
| FAM115C       | 285966     | family with sequence similarity 115, member C                                                       |
| PDK1          | 5163       | pyruvate dehydrogenase kinase, isozyme 1                                                            |
| ACAN          | 176        | aggrecan                                                                                            |
| APOL4         | 80832      | apolipoprotein L, 4                                                                                 |

|           |        |                                                                                                                                           |
|-----------|--------|-------------------------------------------------------------------------------------------------------------------------------------------|
| RELB      | 5971   | v-rel reticuloendotheliosis viral oncogene homolog B                                                                                      |
| RCOR1     | 23186  | REST corepressor 1                                                                                                                        |
| ETV6      | 2120   | ets variant 6                                                                                                                             |
| ACTRT3    | 84517  | actin-related protein T3                                                                                                                  |
| PPP1R16B  | 26051  | protein phosphatase 1, regulatory subunit 16B                                                                                             |
| KIF3A     | 11127  | kinesin family member 3A                                                                                                                  |
| SEC24A    | 10802  | SEC24 family, member A ( <i>S. cerevisiae</i> )                                                                                           |
| DOCK9     | 23348  | dedicator of cytokinesis 9                                                                                                                |
| ZBTB25    | 7597   | zinc finger and BTB domain containing 25                                                                                                  |
| TBX6      | 6911   | T-box 6                                                                                                                                   |
| TCP1      | 6950   | t-complex 1                                                                                                                               |
| NBL1      | 4681   | neuroblastoma, suppression of tumorigenicity 1                                                                                            |
| AK2       | 204    | adenylate kinase 2                                                                                                                        |
| THAP6     | 152815 | THAP domain containing 6                                                                                                                  |
| FST       | 10468  | follistatin                                                                                                                               |
| YPEL4     | 219539 | yippee-like 4 ( <i>Drosophila</i> )                                                                                                       |
| YPEL5     | 51646  | yippee-like 5 ( <i>Drosophila</i> )                                                                                                       |
| SERPINH1  | 871    | serpin peptidase inhibitor, clade H (heat shock protein 47), member 1, (collagen binding protein 1)                                       |
| ARPP19    | 10776  | cAMP-regulated phosphoprotein, 19kDa                                                                                                      |
| ZNF230    | 7773   | zinc finger protein 230                                                                                                                   |
| PHF20L1   | 51105  | PHD finger protein 20-like 1                                                                                                              |
| SMAD7     | 4092   | SMAD family member 7                                                                                                                      |
| RNF145    | 153830 | ring finger protein 145                                                                                                                   |
| GK        | 2710   | glycerol kinase                                                                                                                           |
| HIST1H2AG | 8969   | histone cluster 1, H2ag                                                                                                                   |
| CMSS1     | 84319  | cms1 ribosomal small subunit homolog (yeast)                                                                                              |
| MTMR1     | 8776   | myotubularin related protein 1                                                                                                            |
| RNASET2   | 8635   | ribonuclease T2                                                                                                                           |
| CHD1      | 1105   | chromodomain helicase DNA binding protein 1                                                                                               |
| HSPB11    | 51668  | heat shock protein family B (small), member 11                                                                                            |
| CACYBP    | 27101  | calyculin binding protein                                                                                                                 |
| ERO1L     | 30001  | ERO1-like ( <i>S. cerevisiae</i> )                                                                                                        |
| LEP       | 3952   | leptin                                                                                                                                    |
| RAB8B     | 51762  | RAB8B, member RAS oncogene family                                                                                                         |
| KLHL28    | 54813  | kelch-like 28 ( <i>Drosophila</i> )                                                                                                       |
| SDCBP2    | 27111  | syndecan binding protein (syntenin) 2                                                                                                     |
| ZFP42     | 132625 | zinc finger protein 42 homolog (mouse)                                                                                                    |
| C4orf47   | 441054 | chromosome 4 open reading frame 47                                                                                                        |
| FUT11     | 170384 | fucosyltransferase 11 (alpha (1,3) fucosyltransferase)                                                                                    |
| CHM       | 1121   | choroideremia (Rab escort protein 1)                                                                                                      |
| CHKA      | 1119   | choline kinase alpha                                                                                                                      |
| DNAJB4    | 11080  | DnaJ (Hsp40) homolog, subfamily B, member 4                                                                                               |
| GPNMB     | 10457  | glycoprotein (transmembrane) nmb                                                                                                          |
| C1orf74   | 148304 | chromosome 1 open reading frame 74                                                                                                        |
| NDRG4     | 65009  | NDRG family member 4                                                                                                                      |
| LRP5L     | 91355  | low density lipoprotein receptor-related protein 5-like                                                                                   |
| BAGE      | 574    | B melanoma antigen                                                                                                                        |
| KRAS      | 3845   | v-Ki-ras2 Kirsten rat sarcoma viral oncogene homolog jumonji C domain containing histone demethylase 1 homolog D ( <i>S. cerevisiae</i> ) |
| JHDM1D    | 80853  | <i>S. cerevisiae</i> )                                                                                                                    |
| ATP7A     | 538    | ATPase, Cu <sup>++</sup> transporting, alpha polypeptide                                                                                  |
| HIST1H2AI | 8329   | histone cluster 1, H2ai                                                                                                                   |
| INHBA     | 3624   | inhibin, beta A                                                                                                                           |
| CSH1      | 1442   | chorionic somatomammotropin hormone 1 (placental lactogen)                                                                                |
| HIST1H2AC | 8334   | histone cluster 1, H2ac                                                                                                                   |

|              |           |                                                                                     |
|--------------|-----------|-------------------------------------------------------------------------------------|
| KIAA1147     | 57189     | KIAA1147                                                                            |
| TKTL1        | 8277      | transketolase-like 1                                                                |
| COL7A1       | 1294      | collagen, type VII, alpha 1                                                         |
| PHLDB3       | 653583    | pleckstrin homology-like domain, family B, member 3                                 |
| RAB33A       | 9363      | RAB33A, member RAS oncogene family                                                  |
| WBP5         | 51186     | WW domain binding protein 5                                                         |
| JAG1         | 182       | jagged 1                                                                            |
| HIST1H2AL    | 8332      | histone cluster 1, H2al                                                             |
| ADAMTS17     | 170691    | ADAM metalloproteinase with thrombospondin type 1 motif, 17                         |
| ZNF616       | 90317     | zinc finger protein 616                                                             |
| TRH          | 7200      | thyrotropin-releasing hormone                                                       |
| SPP1         | 6696      | secreted phosphoprotein 1                                                           |
| PASK         | 23178     | PAS domain containing serine/threonine kinase                                       |
| TSC1         | 7248      | tuberous sclerosis 1                                                                |
| SENP2        | 59343     | SUMO1/sentrin/SMT3 specific peptidase 2                                             |
| ZNF562       | 54811     | zinc finger protein 562                                                             |
| LPXN         | 9404      | leupaxin                                                                            |
| CBFA2T2      | 9139      | core-binding factor, runt domain, alpha subunit 2; translocated to, 2               |
| HIST1H2AM    | 8336      | histone cluster 1, H2am                                                             |
| SERPINA1     | 5265      | serpin peptidase inhibitor, clade A (alpha-1 antiproteinase, antitrypsin), member 1 |
| GMNN         | 51053     | geminin, DNA replication inhibitor                                                  |
| CTSL1        | 1514      | cathepsin L1                                                                        |
| CNOT2        | 4848      | CCR4-NOT transcription complex, subunit 2                                           |
| POLR2M       | 81488     | polymerase (RNA) II (DNA directed) polypeptide M                                    |
| ENO2         | 2026      | enolase 2 (gamma, neuronal)                                                         |
| RAB17        | 64284     | RAB17, member RAS oncogene family                                                   |
| SAR1B        | 51128     | SAR1 homolog B (S. cerevisiae)                                                      |
| OXSM         | 54995     | 3-oxoacyl-ACP synthase, mitochondrial                                               |
| CSH2         | 1443      | chorionic somatomammotropin hormone 2                                               |
| AK4          | 205       | adenylate kinase 4                                                                  |
| GFPT2        | 9945      | glutamine-fructose-6-phosphate transaminase 2                                       |
| FAM131A      | 131408    | family with sequence similarity 131, member A                                       |
| CWC25        | 54883     | CWC25 spliceosome-associated protein homolog (S. cerevisiae)                        |
| LOH12CR1     | 118426    | loss of heterozygosity, 12, chromosomal region 1                                    |
| C1orf21      | 81563     | chromosome 1 open reading frame 21                                                  |
| CAMK2N2      | 94032     | calcium/calmodulin-dependent protein kinase II inhibitor 2                          |
| CD109        | 135228    | CD109 molecule                                                                      |
| NDRG1        | 10397     | N-myc downstream regulated 1                                                        |
| RGCC         | 28984     | regulator of cell cycle                                                             |
| GFI1         | 2672      | growth factor independent 1 transcription repressor                                 |
| ZCCHC18      | 644353    | zinc finger, CCHC domain containing 18                                              |
| KDM2B        | 84678     | lysine (K)-specific demethylase 2B                                                  |
| CCDC47       | 57003     | coiled-coil domain containing 47                                                    |
| UBR2         | 23304     | ubiquitin protein ligase E3 component n-recognin 2                                  |
| PLIN5        | 440503    | perilipin 5                                                                         |
| RAPH1        | 65059     | Ras association (RalGDS/AF-6) and pleckstrin homology domains 1                     |
| CCNH         | 902       | cyclin H                                                                            |
| NSUN4        | 387338    | NOP2/Sun domain family, member 4                                                    |
| HSP90AA1     | 3320      | heat shock protein 90kDa alpha (cytosolic), class A member 1                        |
| AP3M2        | 10947     | adaptor-related protein complex 3, mu 2 subunit                                     |
| LOC100507855 | 100507855 | adenylate kinase isoenzyme 4, mitochondrial-like                                    |
| NAA30        | 122830    | N(alpha)-acetyltransferase 30, NatC catalytic subunit                               |
| CYSTM1       | 84418     | cysteine-rich transmembrane module containing 1                                     |
| DNAJA4       | 55466     | DnaJ (Hsp40) homolog, subfamily A, member 4                                         |
| RSC1A1       | 6248      | regulatory solute carrier protein, family 1, member 1                               |

|         |        |                                                                           |
|---------|--------|---------------------------------------------------------------------------|
| ST6GAL1 | 6480   | ST6 beta-galactosamide alpha-2,6-sialyltransferase 1                      |
| CHTOP   | 26097  | chromatin target of PRMT1                                                 |
| NR3C1   | 2908   | nuclear receptor subfamily 3, group C, member 1 (glucocorticoid receptor) |
| PTPRC   | 5788   | protein tyrosine phosphatase, receptor type, C                            |
| PLXNA3  | 55558  | plexin A3                                                                 |
| ANKRD37 | 353322 | ankyrin repeat domain 37                                                  |
| CCNDBP1 | 23582  | cyclin D-type binding-protein 1                                           |

---

The list was generated by positive selection of up-regulated genes in non-irradiated PBMC with SignalP and SecretomeP analysis followed by negative selection with TMHMM analysis excluding proteins with transmembrane helices.
